# Supplementary material for: Solar-powered bioelectrochemical system for efficient cadmium remediation and recovery of reusable solids
Source: Royal Society of Chemistry journal article supplement (doi:10.1039/d5ra07856c), 2026-01-01
Supplement: d5ra07856c1.pdf [file d5ra07856c1.pdf]

Date: December 19, 2025

For submission to *RSC Advances*

## **Solar-powered bioelectrochemical system for efficient cadmium remediation and recovery of reusable solids**

**Yeonu Im<sup>a,\*</sup>, Minsoo Kim<sup>b,\*</sup>, Yuri Kim<sup>a,c</sup>, Soo Youn Lee<sup>c</sup>, Minkyung Kim<sup>d</sup>, Tae-Hoon  
Kim<sup>e</sup>, Jinhee Heo<sup>f</sup> and Changman Kim<sup>a,g</sup>**

<sup>a</sup>Department of Biotechnology and Bioengineering, Chonnam National University, Gwangju, 61188,  
Republic of Korea

<sup>b</sup> School of Chemical Engineering, Pusan National University, Busan, 46241, Republic of Korea

<sup>c</sup> Gwangju Bioenergy R&D Center, Korea Institute of Energy Research (KIER), Gwangju 34129,  
Republic of Korea

<sup>d</sup>Department of Oceanography /KNU G-LAMP Project Group, Kyungpook National University,  
Daegu 41566, Republic of Korea

<sup>e</sup>Department of Earth Systems and Environmental Sciences, Chonnam National University, Gwangju,  
61188, Republic of Korea

<sup>f</sup>Advanced Characterization & Analysis Research Group, Korea Institute of Materials Science  
(KIMS), Changwon 51508, Republic of Korea

<sup>g</sup> Institute of Synthetic Biology for Carbon Neutralization, Chonnam National University, Gwangju,  
61188, Republic of Korea

\* The first two authors equally contributed to the manuscript.

### **Corresponding author**

**Prof. Changman Kim**

Department of Biotechnology and Bioengineering,

Chonnam National University, Gwangju 61188, Republic of Korea

E-mail address: cmkim@jnu.ac.kr; Phone: +82-10-4566-2661, Fax: +82.62.530.1949

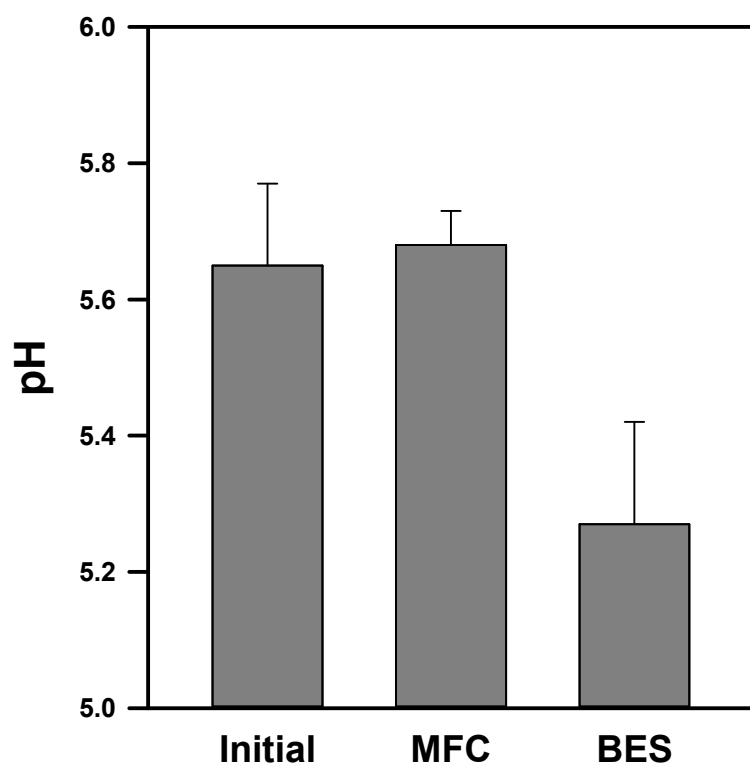

**Fig. S1.** Bulk pH of the catholyte before operation (Initial) and after 7 days under self-biased MFC and PV-assisted BES conditions (mean  $\pm$  SD, n = 3).

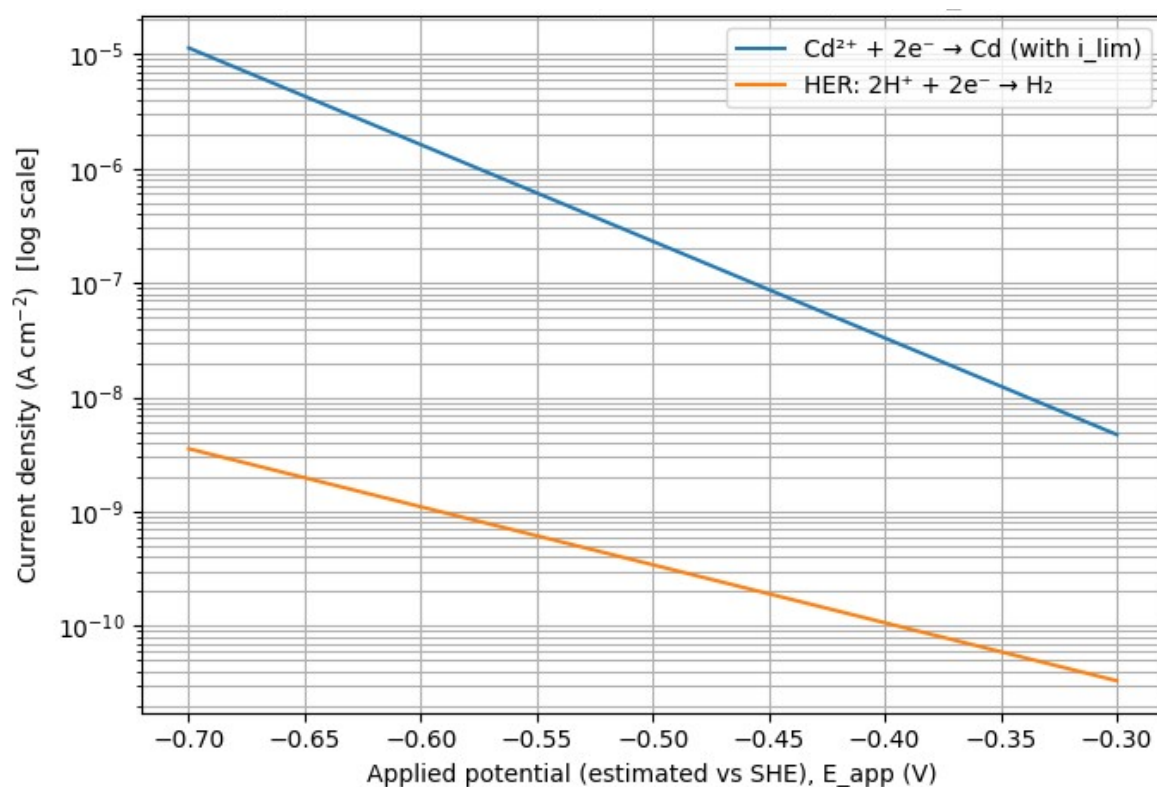

**Fig. S2.** Butler–Volmer estimates of cathodic competition between Cd<sup>2+</sup> reduction (Cd<sup>2+</sup> + 2e<sup>-</sup> → Cd, blue) and the hydrogen evolution reaction (HER, orange) at 25 °C. Calculations assume representative kinetic parameters for indium tin oxide (ITO) electrodes in mildly acidic conditions and include a diffusion-limited current density for Cd<sup>2+</sup> reduction.
